# Supplementary material
Source: publisher figshare collection journal article supplement (https://sage.figshare.com/ndownloader/files/17823101)
Supplement: Supplementary file 1 [file 17823101]

Supplemental Table 1. Bivariate Correlations among Study Variables.

| Variable                                    | 1     | 2     | 3     | 4     | 5     | 6     | 7     | 8     | 9     | 10   |
|---------------------------------------------|-------|-------|-------|-------|-------|-------|-------|-------|-------|------|
| 1. Mother attachment anxiety                |       |       |       |       |       |       |       |       |       |      |
| 2. Father attachment anxiety                | .36*  |       |       |       |       |       |       |       |       |      |
| 3. Mother ratings of partner responsiveness | -.51* | -.32* |       |       |       |       |       |       |       |      |
| 4. Maternal age                             | -.14* | -.18* | .01   |       |       |       |       |       |       |      |
| 5. Adjusted per capita household income     | -.17* | -.15* | .09*  | .36*  |       |       |       |       |       |      |
| 6. Latina ethnicity <sup>a</sup>            | .19*  | .19*  | -.04  | -.15* | -.15* |       |       |       |       |      |
| 7. Black race <sup>a</sup>                  | .06   | .03   | -.11* | -.28* | -.16* | -.50* |       |       |       |      |
| 8. Relationship status                      | -.08* | -.05  | .10*  | .31*  | .17*  | .15*  | -.34* |       |       |      |
| 9. Breastfeeding                            | .01   | -.01  | -.01  | .24*  | .11*  | .10*  | -.25* | .08*  |       |      |
| 10. Medication                              | -.03  | -.07† | .04   | .11*  | .04   | -.18* | .00   | .03   | -.03  |      |
| 11. Allostatic load                         | .11*  | .10*  | -.13* | -.08* | -.12* | .01   | .19*  | -.12* | -.21* | .09* |

Note:  $N = 698$ ; Correlations were run using transformed variables. <sup>a</sup> Effects coded with White as the reference group.

\* $p < .05$ , †  $p < .10$
